# Supplementary material
Source: publisher figshare collection journal article supplement (https://tandf.figshare.com/articles/dataset/_/6030848)
Supplement: Supplementary file 1 [file 1]

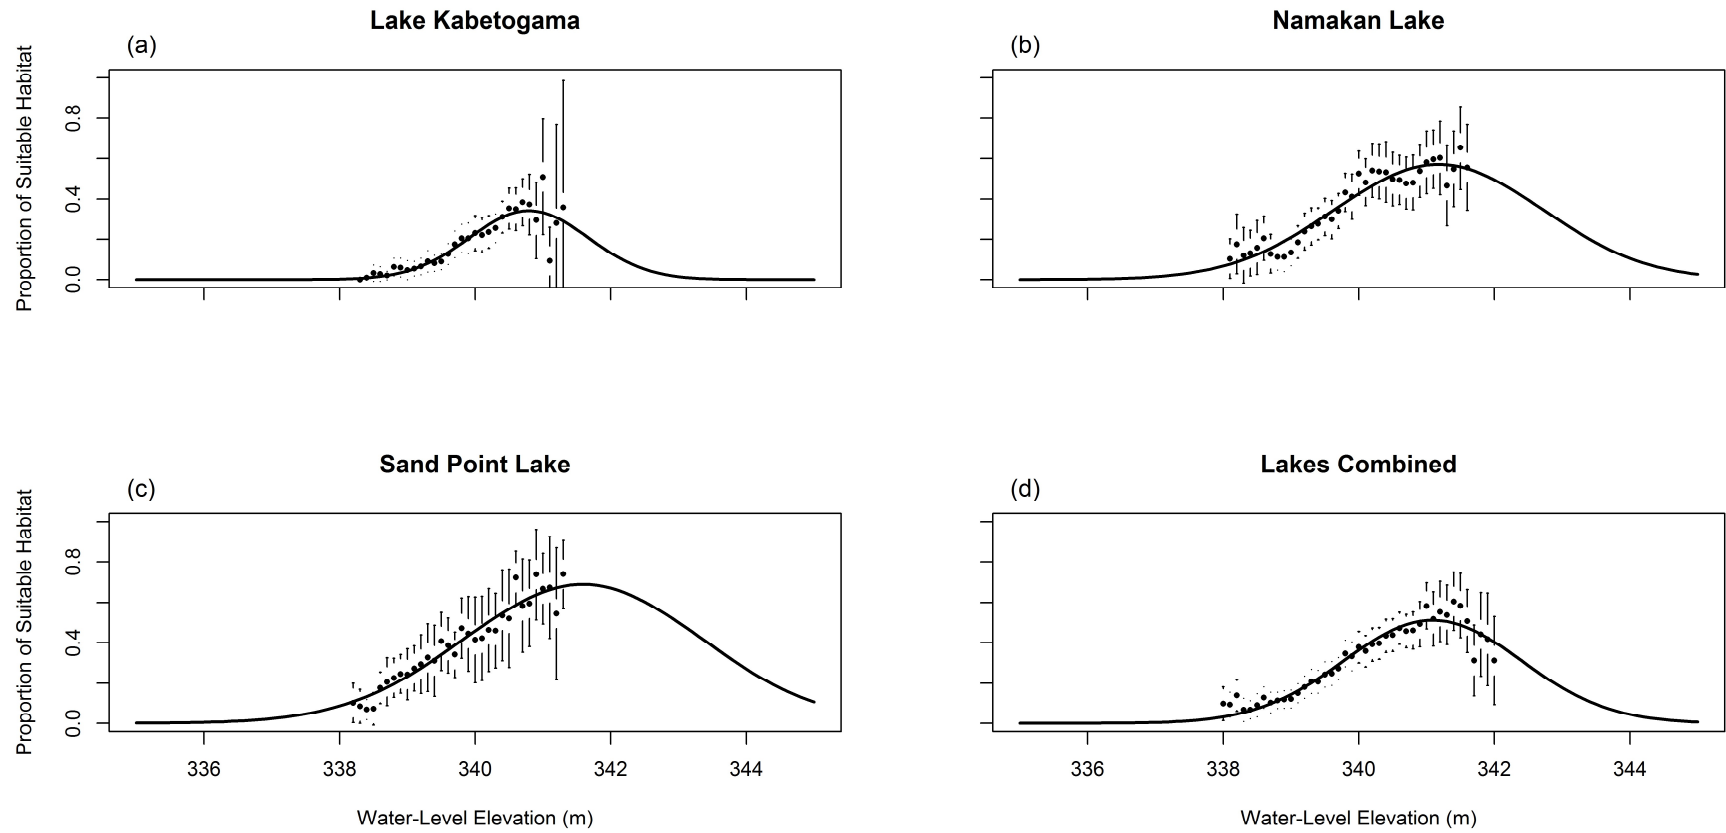

**Figure S1.** Gaussian functions (lines) fit to observed substrate suitability data (dots  $\pm$  CI) using nonlinear least squares for (a–c) each large lake in the reservoir, and (d) all data in aggregate.
