# Supplementary material
Source: publisher figshare collection journal article supplement (https://tandf.figshare.com/articles/dataset/_/6030848)
Supplement: Supplementary file 2 [file 1]

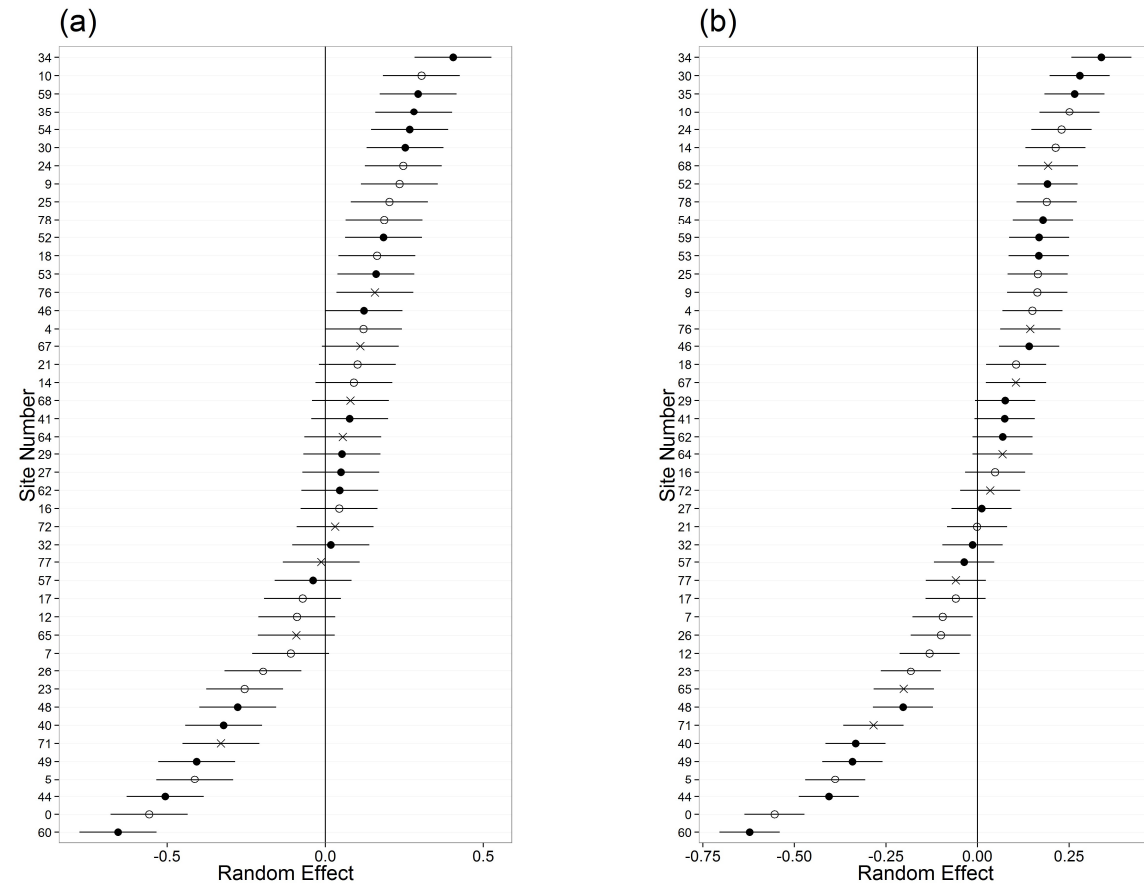

**Figure S3.** Estimates of the random site effects of the proportion of available preferred substrates during spawning seasons (1970-2014) on 44 sites in the Namakan Reservoir using observed (a) and modeled (b) water levels. Results are shown by lake: Lake Kabetogama ( $\circ$ ), Namakan Lake ( $\bullet$ ), and Sand Point Lake ( $\times$ ). Error bars are predictions intervals.
