# Supplementary material
Source: publisher figshare collection journal article supplement (https://tandf.figshare.com/articles/dataset/_/6030848)
Supplement: Supplementary file 3 [file 1]

**Table S1.** The classification scale used in surveying boreal lacustrine shoreline habitat in the Namakan Reservoir. Substrate classes were modified from the typical Wentworth scale (Raabe 2006). Sample codes were used to geo-reference sample locations and for quantifying substrate means and variance.

| inorganic substrate type (class) | size (mm)    | sample code |
|----------------------------------|--------------|-------------|
| Silt                             | < 0.2        | 0           |
| Sand                             | 0.2–6.4      | 1           |
| gravel                           | 6.4–76.0     | 2           |
| cobble                           | 76.0–150.0   | 3           |
| rubble                           | 150.0–304.0  | 4           |
| small boulder                    | 304.0–610.0  | 5           |
| large boulder                    | >610.0       | 6           |
| bedrock                          | consolidated | 7           |
