# Supplementary material
Source: publisher figshare collection journal article supplement (https://tandf.figshare.com/articles/dataset/_/6030848)
Supplement: Supplementary file 4 [file 1]

**Table S2.** Summary of Namakan Reservoir study site characteristics. Study sites each demonstrated 3 consecutive years (2012–2014) of walleye spawning as determined by the presence of walleye eggs. Sites were located on the 3 large lake bodies of the Namakan Reservoir: Lake Kabetogama (KAB), Namakan Lake (NAM), and Sand Point Lake (SP). Thirty sites were located in the U.S. (US) and 14 were located in Canada (CAN). Morphological site characteristics were estimated using the DEM, rather than actual on site measurement. Site coordinates are in UTM Zone 15N projection.

| site ID | lake name | country | area of surveyed substrate (m <sup>2</sup> ) | shoreline length (m) | mean slope (°) | mean elevation (m) | mean aspect (°) | northing (m) | easting (m) |
|---------|-----------|---------|----------------------------------------------|----------------------|----------------|--------------------|-----------------|--------------|-------------|
| 0       | KAB       | US      | 658                                          | 35                   | 1.9            | 339.7              | 241             | 5368411      | 501939      |
| 4       | KAB       | US      | 1213                                         | 60                   | 1.7            | 339.8              | 228             | 5368102      | 499808      |
| 5       | KAB       | US      | 731                                          | 65                   | 2.5            | 339.9              | 178             | 5368079      | 500438      |
| 7       | KAB       | US      | 1190                                         | 75                   | 3.1            | 339.8              | 218             | 5370393      | 500452      |
| 9       | KAB       | US      | 1140                                         | 80                   | 2.6            | 340.0              | 207             | 5371492      | 499377      |
| 10      | KAB       | US      | 870                                          | 55                   | 2.6            | 339.8              | 103             | 5372838      | 495454      |
| 12      | KAB       | US      | 1176                                         | 60                   | 1.9            | 339.8              | 230             | 5372657      | 494864      |
| 14      | KAB       | US      | 1050                                         | 40                   | 1.7            | 339.7              | 219             | 5371408      | 495985      |
| 16      | KAB       | US      | 810                                          | 60                   | 2.4            | 340.0              | 237             | 5372398      | 496535      |
| 17      | KAB       | US      | 1512                                         | 75                   | 1.4            | 339.9              | 314             | 5371634      | 496689      |
| 18      | KAB       | US      | 563                                          | 40                   | 2.5            | 340.0              | 57              | 5365029      | 504991      |
| 21      | KAB       | US      | 1338                                         | 70                   | 1.1            | 340.2              | 51              | 5365252      | 503839      |
| 23      | KAB       | US      | 632                                          | 60                   | 3.7            | 340.1              | 176             | 5367255      | 504848      |
| 24      | KAB       | US      | 1503                                         | 100                  | 1.7            | 340.1              | 199             | 5367529      | 505205      |
| 25      | KAB       | US      | 932                                          | 90                   | 2.9            | 340.3              | 260             | 5365436      | 508242      |
| 26      | KAB       | US      | 1037                                         | 100                  | 3.4            | 340.4              | 254             | 5365531      | 508579      |

**Table S2 Cont.**

|    |     |     |      |    |     |       |     |         |        |
|----|-----|-----|------|----|-----|-------|-----|---------|--------|
| 78 | KAB | US  | 530  | 40 | 2.5 | 340.1 | 204 | 5372733 | 494030 |
| 27 | NAM | US  | 469  | 40 | 3.6 | 339.8 | 157 | 5366112 | 515268 |
| 29 | NAM | US  | 631  | 70 | 3.2 | 340.1 | 147 | 5365981 | 517651 |
| 30 | NAM | US  | 511  | 40 | 4.5 | 340.0 | 234 | 5364528 | 520317 |
| 32 | NAM | US  | 730  | 45 | 3.5 | 339.7 | 110 | 5364315 | 520724 |
| 34 | NAM | US  | 441  | 40 | 2.2 | 338.9 | 215 | 5366929 | 518647 |
| 35 | NAM | US  | 1166 | 60 | 2.4 | 339.7 | 254 | 5364283 | 522951 |
| 40 | NAM | US  | 1002 | 70 | 3.1 | 339.8 | 164 | 5365846 | 516475 |
| 41 | NAM | US  | 815  | 60 | 4.8 | 339.7 | 171 | 5364589 | 524682 |
| 44 | NAM | US  | 474  | 40 | 1.1 | 339.1 | 111 | 5365404 | 534707 |
| 46 | NAM | CAN | 560  | 40 | 0.8 | 339.6 | 183 | 5366601 | 536383 |
| 48 | NAM | CAN | 1013 | 60 | 2.6 | 339.9 | 52  | 5365527 | 538121 |
| 49 | NAM | CAN | 503  | 45 | 0.6 | 339.4 | 169 | 5367984 | 538200 |
| 52 | NAM | CAN | 1402 | 60 | 2.1 | 340.1 | 153 | 5367930 | 535604 |
| 53 | NAM | CAN | 553  | 30 | 1.7 | 340.0 | 134 | 5367964 | 534518 |
| 54 | NAM | CAN | 578  | 30 | 1.6 | 340.2 | 233 | 5368020 | 534263 |
| 57 | NAM | CAN | 950  | 50 | 2.0 | 340.1 | 194 | 5368204 | 533444 |
| 59 | NAM | CAN | 649  | 30 | 1.1 | 339.5 | 220 | 5368645 | 532971 |
| 60 | NAM | CAN | 715  | 50 | 2.7 | 339.9 | 220 | 5368227 | 531672 |
| 62 | NAM | CAN | 445  | 25 | 1.6 | 340.1 | 189 | 5367656 | 531087 |
| 64 | SP  | US  | 1183 | 75 | 2.8 | 339.9 | 181 | 5361690 | 539559 |
| 65 | SP  | US  | 537  | 40 | 2.9 | 339.7 | 93  | 5358474 | 538548 |
| 67 | SP  | US  | 667  | 55 | 3.2 | 339.4 | 59  | 5356481 | 538165 |
| 68 | SP  | US  | 726  | 25 | 1.3 | 339.4 | 160 | 5354191 | 539112 |
| 71 | SP  | CAN | 460  | 35 | 3.6 | 340.4 | 242 | 5355394 | 539482 |
| 72 | SP  | CAN | 551  | 40 | 4.1 | 340.1 | 258 | 5356037 | 539369 |
| 76 | SP  | CAN | 761  | 60 | 3.3 | 339.5 | 106 | 5359532 | 540062 |
| 77 | SP  | CAN | 1124 | 60 | 2.8 | 339.5 | 233 | 5360759 | 540953 |

---
