# Supplementary material
Source: publisher figshare collection journal article supplement (https://tandf.figshare.com/articles/dataset/_/6030848)
Supplement: Supplementary file 5 [file 1]

Archive with 5 entries (5 files):
- ulrm_a_1448021_sm2971.pdf
- ulrm_a_1448021_sm2969.pdf
- ulrm_a_1448021_sm2963.pdf
- ulrm_a_1448021_sm2962.pdf
- ulrm_a_1448021_sm2958.pdf
